# Supplementary material for: Role for a Filamentous Nuclear Assembly of IFI16, DNA, and Host Factors in Restriction of Herpesviral Infection
Source: PubMed Central journal article supplement (PMC6343039; doi:10.1128/mbio.02621-18), 2019-01-22

# Suppl. Fig. 4

## A

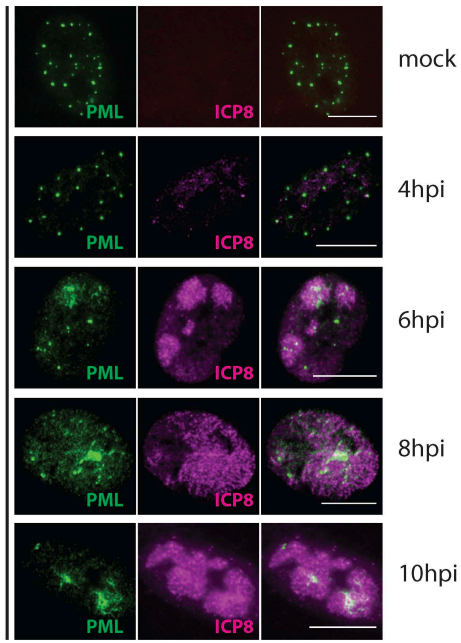

## B

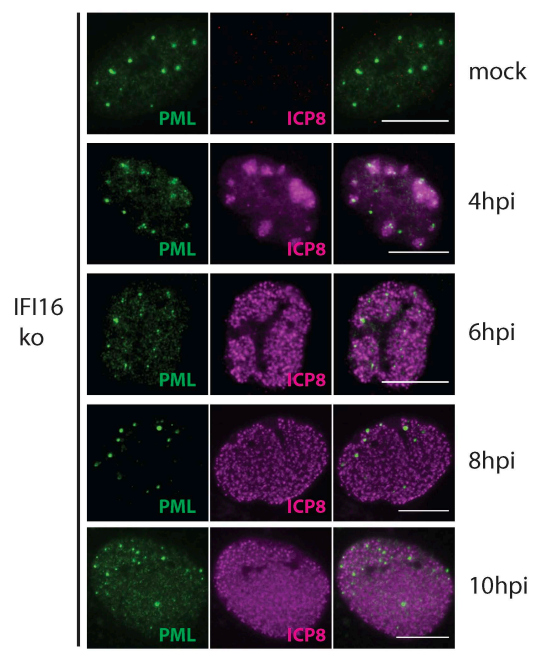

## C

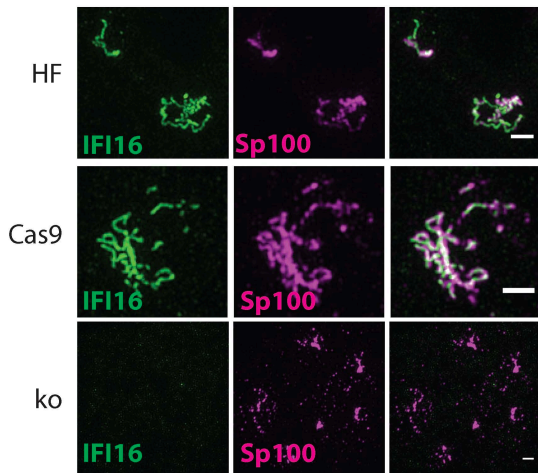

Supplement: mBio.02621-18-sf004.pdf [file mBio.02621-18-sf004.pdf]
